## 1 **Estimating the infection fatality risk of COVID-19 in New York City, March 1–May 16, 2020**

2 Wan Yang,<sup>1\*</sup> Sasikiran Kandula,<sup>2</sup> Mary Huynh,<sup>3</sup> Sharon K. Greene,<sup>4</sup> Gretchen Van Wye,<sup>3</sup> Wenhui  
3 Li,<sup>3</sup> Hiu Tai Chan,<sup>3</sup> Emily McGibbon,<sup>4</sup> Alice Yeung,<sup>4</sup> Donald Olson,<sup>5</sup> Anne Fine,<sup>4</sup> Jeffrey Shaman<sup>2</sup>

4 <sup>1</sup>Department of Epidemiology, Mailman School of Public Health, Columbia University;

5 <sup>2</sup>Department of Environmental Health Sciences, Mailman School of Public Health, Columbia  
6 University; <sup>3</sup>Bureau of Vital Statistics, New York City Department of Health and Mental Hygiene;

7 <sup>4</sup>Bureau of Communicable Disease, New York City Department of Health and Mental Hygiene;

8 <sup>5</sup>Bureau of Equitable Health Systems, New York City Department of Health and Mental Hygiene.

9 \*correspondence to: wy2202@cumc.columbia.edu (WY)

### 10 11 **Abstract**

12 During March 1-May 16, 2020, 191,392 laboratory-confirmed COVID-19 cases were diagnosed  
13 and reported and 20,141 confirmed and probable COVID-19 deaths occurred among New York  
14 City (NYC) residents. We applied a network model-inference system developed to support the  
15 City's pandemic response to estimate underlying SARS-CoV-2 infection rates. Based on these  
16 estimates, we further estimated the infection fatality risk (IFR) for 5 age groups (i.e. <25, 25-44,  
17 45-64, 65-74, and 75+ years) and all ages overall, during March 1–May 16, 2020. We estimated  
18 an overall IFR of 1.45% (95% Credible Interval: 1.09-1.87%) in NYC. In particular, weekly IFR was  
19 estimated as high as 6.1% for 65-74 year-olds and 17.0% for 75+ year-olds. These results are  
20 based on more complete ascertainment of COVID-19-related deaths in NYC and thus likely  
21 more accurately reflect the true, higher burden of death due to COVID-19 than previously  
22 reported elsewhere. It is thus crucial that officials account for and closely monitor the infection  
23 rate and population health outcomes and enact prompt public health responses accordingly as  
24 the pandemic unfolds.

25 **Key words:** COVID-19; infection fatality risk; age-specific; reporting rate; New York City

### 26 27 **Introduction**

28 The novel coronavirus SARS-CoV-2 emerged in late 2019 in China and subsequently spread to  
29 200+ other countries. As of June 26, 2020, there were over 9.47 million reported COVID-19

30 cases and over 484.2 thousand deaths worldwide.<sup>1</sup> As the pandemic continues to unfold and  
31 populations in many places worldwide largely remain susceptible, understanding the severity,  
32 in particular, the infection fatality risk (IFR), is crucial for gauging the full impact of COVID-19 in  
33 the coming months or years. However, estimating the IFR of COVID-19 is challenging due to the  
34 large number of undocumented infections, fluctuating case detection rates, and inconsistent  
35 reporting of fatalities. Further, the IFR of COVID-19 could vary by location, given differences in  
36 demographics, healthcare systems, and social construct (e.g., intergenerational households are  
37 the norm in some societies whereas older adults commonly reside and congregate in long-term  
38 care and adult care facilities in others). Most IFR estimates thus far have come from data  
39 recorded in China, the Diamond Princess cruise ship, and France.<sup>2-5</sup> Yet the IFR in the United  
40 States—the country currently reporting the largest number of cases—remains unclear.

41  
42 New York City (NYC) reported its first case on March 1, 2020, in a traveler, and quickly  
43 became the epicenter in the United States. By May 16, 2020, there were 191,392 diagnosed  
44 cases and 20,131 deaths reported in NYC (Table 1). During the pandemic, the NYC Department  
45 of Health and Mental Hygiene (DOHMH) and the Mailman School of Public Health at Columbia  
46 University have been collaborating in generating real-time model projections in support of the  
47 City's pandemic response. Our latest model-inference system uses a network model to simulate  
48 SARS-CoV-2 transmission in the City's 42 United Hospital Fund neighborhoods.<sup>6</sup> The model is  
49 run in conjunction with the Ensemble Adjustment Kalman Filter (EAKF)<sup>7</sup> and fit simultaneously  
50 to case and mortality data for each of the 42 neighborhoods while accounting for under-  
51 detection, delay from infection to case reporting and death, and changing interventions (e.g.,  
52 social distancing). In this study, we apply this network model-inference system to estimate the  
53 IFR for 5 age groups (i.e. <25, 25-44, 45-64, 65-74, and 75+ years) and all ages overall, from  
54 March 1 to May 16, 2020. In the process, we also estimate reporting rates—i.e. the fraction of  
55 infections documented as confirmed cases—and the cumulative infection rate by May 16, 2020.

56

## 57 **Methods**

58 Data

59 Laboratory-confirmed COVID-19 cases reported to the NYC DOHMH were aggregated by week  
60 of diagnosis and age group (<1, 1-4, 5-14, 15-24, 25-44, 45-64, 65-74, and 75+ years) for each of  
61 the 42 United Hospital Fund neighborhoods<sup>6</sup> in NYC, according to the patient's residential  
62 address at time of report. The mortality data, from deaths registered and analyzed by the NYC  
63 DOHMH, combined confirmed and probable COVID-19-associated deaths. Confirmed COVID-19-  
64 associated deaths were defined as those occurring in persons with laboratory-confirmed SARS-  
65 CoV-2 infection; and probable COVID-19 deaths were defined as those with COVID-19, SARS-  
66 CoV-2, or a similar term listed on the death certificate as an immediate, underlying, or  
67 contributing cause of death but did not have laboratory-confirmation of COVID-19.<sup>8</sup> Due to  
68 privacy concerns, mortality data were aggregated to 5 coarser age groups (<18, 18-44, 45-64,  
69 65-74, and 75+ years) for each neighborhood by week of death. To match with the age grouping  
70 for case data, we used the citywide fraction of deaths occurring in each of the five finer age  
71 groups (i.e. <1, 1-4, 5-14, 15-24, 25-44) to apportion deaths in the <18 and 18-44 year age  
72 categories. For this study, case and mortality data were both retrieved on May 22, 2020.

73

74 The mobility data, used to model changes in COVID-19 transmission rate due to public  
75 health interventions implemented during the pandemic (e.g., social distancing), came from  
76 SafeGraph<sup>9,10</sup> and contained counts of visitors to locations in each zip code based on mobile  
77 device locations. The released data were anonymized and aggregated in weekly intervals. We  
78 spatially aggregated these data to the neighborhood level.

79

80 This study was classified as public health surveillance and exempt from ethical review  
81 and informed consent by the Institutional Review Boards of both Columbia University and NYC  
82 DOHMH.

83

84 Network transmission model

85 The network model simulated intra- and inter neighborhood transmission of COVID-19 and  
86 assumed susceptible-exposed-infectious-removed (SEIR) dynamics, per the following equations:

$$\left\{ \begin{array}{l} \frac{dS_i}{dt} = -S_i \sum_{j=1}^{j=42} b_j \beta_{city} c_{ij} I_j / N_j \\ \frac{dE_i}{dt} = S_i \sum_{j=1}^{j=42} b_j \beta_{city} c_{ij} I_j / N_j - \frac{E_i}{Z} \\ \frac{dI_i}{dt} = \frac{E_i}{Z} - \frac{I_i}{D} \\ \frac{dR_i}{dt} = \frac{I_i}{D} \end{array} \right.$$

87  
88  
89 where  $S_i$ ,  $E_i$ ,  $I_i$ ,  $R_i$ , and  $N_i$  are the numbers of susceptible, exposed (but not yet infectious),  
90 infectious, and removed (either recovered or deceased) individuals and the total population,  
91 respectively, from a given age group (described below) in neighborhood  $i$ .  $\beta_{city}$  is the citywide  
92 transmission rate, which incorporated seasonal variation as observed for OC43, a beta-  
93 coronavirus in humans from the same genus as SARS-CoV-2.<sup>11</sup> To allow differential transmission  
94 in each neighborhood, we included a multiplicative factor,  $b_i$ , to scale neighborhood local  
95 transmission rates.  $Z$  and  $D$  are the latency and infectious periods, respectively (Table S1).

96  
97 The matrix  $[c_{ij}]$  represents changes in contact rates over time and connectivity among  
98 neighborhoods and was computed based on mobility data. Briefly, changes in contact rates  
99 (either intra or inter neighborhoods) for week- $t$  were computed as a ratio of the number of  
100 visitors during week- $t$  to that during the week of March 1, 2020 (the first week of the pandemic  
101 in NYC when there were no interventions in place), and further scaled by a multiplicative factor  
102  $m_1$ ;  $m_1$  was estimated along with other parameters. To compute the connectivity among the  
103 neighborhoods, we first divided the inter-neighborhood mobility by the local mobility (this gave  
104 a relative measure of connectivity; e.g., if two neighborhoods are highly connected with lots of  
105 individuals traveling between them, inter-neighborhood mobility would be closer to 1 and  
106 much lower than 1 otherwise); we then scaled these relative rates by a multiplicative factor  $m_2$ ,  
107 which was also estimated along with other parameters.

108  
109 Observation model

110 To account for delays in diagnosis and reporting, we included a time-from-infectious-to-case-  
111 reporting (i.e., diagnosis) lag, drawn from a gamma distribution with a mean of  $T_m$  and standard  
112 deviation (SD) of  $T_{sd}$  days. To account for under-detection, we included a case reporting rate ( $r$ ),  
113 i.e. the fraction of infections (including subclinical or asymptomatic infections) reported as  
114 cases. To compute the model-simulated number of new cases per week, we multiplied the  
115 model-simulated number of infections per day (including those from the previous weeks) by the  
116 reporting rate, and further distributed these simulated cases in time per the distribution of  
117 time-from-infectious-to-case-reporting. We then aggregated the daily lagged, reported cases to  
118 weekly totals for model inference (see below). Similarly, to compute the model-simulated  
119 deaths per week, we multiplied the simulated-infections by the IFR and then distributed these  
120 simulated deaths in time per the distribution of time-from-infectious-to-death, and aggregated  
121 these daily numbers to weekly totals. For each week, the reporting rate ( $r$ ), the mean ( $T_m$ ) and  
122 standard deviation ( $T_{sd}$ ) of time-from-infectious-case-reporting, and the IFR were estimated  
123 based on weekly case and mortality data. The distribution of time-from-diagnosis-to-death was  
124 based on observations of  $n=15,686$  COVID-19 confirmed deaths in NYC (gamma distribution  
125 with mean = 9.36 days and SD = 9.76 days; Table S1).

## 126 127 Parameter estimation

128 To estimate model parameters ( $b_i$ ,  $\theta_{city}$ ,  $Z$ ,  $D$ ,  $m_1$ ,  $m_2$ ,  $T_m$ ,  $T_{sd}$ ,  $r$ , and  $IFR$ , for  $i=1,\dots,42$ ) and state  
129 variables ( $S_i$ ,  $E_i$ , and  $I_i$ , for  $i=1,\dots,42$ ) for each week, we ran the network-model stochastically  
130 with a daily time step in conjunction with the EAKF and fit to weekly case and mortality data  
131 from the week starting March 1 to the week ending May 16, 2020. The EAKF uses an ensemble  
132 of model realizations ( $n=500$  here), each with initial parameters and variables randomly drawn  
133 from a prior range (see Table S1). After model initialization, the model ensemble was integrated  
134 forward in time for a week to compute the model-simulated number of cases and deaths for  
135 that week; these prior estimates were then combined with the observed cases and deaths for  
136 the same week to compute the posterior per Bayes' theorem.<sup>7</sup> The posterior distribution of  
137 each model parameter/variable was updated for that week at the same time.<sup>7</sup> This parameter  
138 estimation process was done separately for each of the eight age groups (i.e. <1, 1-4, ..., and

139 75+). To account for stochasticity in model initiation, we ran the parameter estimation process  
140 independently 10 times. Results for each age group were combined from these 10 runs (each  
141 with 500 realizations). To combine estimates of reporting rate and IFR for <25 year-olds or all  
142 ages overall, we weighted the age-group specific estimates by the fraction of estimated  
143 infections from each related group.

144

## 145 **Results**

146 The model-inference system was able to recreate the case and mortality time series for each  
147 age group and all ages overall (Fig. 1). For most age groups, confirmed cases peaked during the  
148 week of March 29 and the mortality rate peaked about one week later than the case rate, due  
149 to the time-lag from severe infection to death (Fig. 1).

150

151 There were, however, substantial under-detection of infections, variations by age group,  
152 and fluctuations of case reporting rates over time, in part due to changing testing criteria (e.g.,  
153 testing was restricted to severely ill patients in the early phase due to material shortages in  
154 testing equipment and personal protective equipment). The estimated reporting rate for all  
155 ages overall started at a low level of 2.3% [median; 95% credible interval (CrI): 0.4–4.5%; same  
156 below] in the week of March 1; it increased to 21.4% (95% CrI: 14.4–31.3%) in the week of  
157 March 15 and stayed at similar levels afterwards (Fig 2F). The estimated reporting rate was  
158 highest for the two oldest age groups and substantially lower for younger age groups (Fig 2 D  
159 and E vs. Fig 2 A-C). During the last week of this study (i.e., May 10, 2020), we estimated that  
160 25.9% (95% CrI: 15.1–41.8%) of infections among 65-74 year-olds and 34.2% (95% CrI: 23.0–  
161 49.9%) among 75+ year-olds were reported; in comparison, only 10.6% (95% CrI: 7.4–17.7%) of  
162 infections among <25 year-olds and 16.9% (95% CrI: 13.1–26.8%) among 25-44 year-olds were  
163 reported.

164

165 After accounting for the case reporting rate, the epidemic peak for new infections  
166 occurred one week sooner during the week of March 22, 2020 for <45 year-olds and all ages  
167 combined (Fig 2 A-B and F). This was coincident with the timing of public health interventions in

168 NYC – public schools in NYC were closed on March 16, 2020 and a citywide stay-at-home order  
169 was imposed starting the week of March 22, 2020.<sup>12</sup> Tallied over the entire study period, the  
170 estimated overall cumulative infection rate was 15.8% (95% CrI: 11.4–24.4%) by May 16, 2020.  
171 However, the estimated cumulative infection rate varied substantially by age group.  
172 Specifically, 25-44 and 45-64 year-olds had the highest cumulative infection rates, at 20.1%  
173 (95% CrI: 14.4–30.0%) and 20.7% (95% CrI: 15.7–28.0%), respectively; 65-74 and 75+ year-olds  
174 had the second highest cumulative infection rates, at 14.9% (95% CrI: 11.2–22.8%) and 12.9%  
175 (95% CrI: 9.9–19.9%); and <25 year-olds had the lowest cumulative infection rate (8.0%; 95%  
176 CrI: 5.1–16.7%). Of note, these estimates, albeit with large uncertainties, are in line with  
177 reported measures from serology surveys (e.g., 19.9% positive in NYC, as of May 1, 2020, likely  
178 from testing of 25-64 year-olds<sup>13, 14</sup>). In addition, the spatial variation estimated by our model-  
179 inference system<sup>15</sup> was in line with reported measures (i.e., highest in the Bronx and lowest in  
180 Manhattan<sup>13, 14</sup>). This consistency with independent serology survey data provides some  
181 independent validation of our model estimates.

182

183 During March 1 - May 16, 2020, a total of 20,141 COVID-19 deaths (15,723 confirmed  
184 and 4,418 probable) and 191,392 COVID-confirmed cases were reported in NYC. The crude  
185 confirmed case fatality risk was thus 8.22%. After accounting for changing case reporting rates  
186 and excluding the first three weeks (i.e., March 1-21, 2020) with zero or few reported deaths  
187 for which model estimates were less accurate, we estimate that the overall IFR, including both  
188 confirmed and probable deaths, was 1.45% (95% CrI: 1.09–1.87%) during March 22 – May 16,  
189 2020.

190

191 Examining estimates by age group, estimated IFR was lowest in young age groups. The  
192 average IFR was 0.011% (95% CrI: 0.005–0.016%) for <25 year-olds, increased by ~10 fold to  
193 0.12% (95% CrI: 0.077–0.15%) for 25-44 year-olds, and by another 7 fold to 0.94% (95% CrI:  
194 0.74–1.21%) for 45-64 year-olds (Fig. 3 A-C). These estimates were similar to IFRs reported for  
195 China for corresponding age groups.<sup>3</sup> However, the estimated IFR for the two oldest age  
196 groups was much higher than the younger age groups and about twice as high as rates reported



197 for these age groups in China.<sup>3, 4</sup> The average IFR was 4.67% (95% CrI: 3.21–6.66%) for 65-74  
198 year-olds and 13.83% (95% CrI: 9.65–17.78%) for 75+ year-olds. In addition, the estimated IFR  
199 fluctuated substantially over time for these two elderly groups. For 65-74 year-olds, estimated  
200 IFR was 6.10% (95% CrI: 4.90–7.57%) during the week of April 5, 2020 but decreased to 3.79%  
201 (95% CrI: 1.68–6.90%) during the week of May 10, 2020 (Fig 3D). For 75+ year-olds, IFR was  
202 estimated to be 16.99% (95% CrI: 13.15–20.11%) during the week of April 5, 2020 but  
203 decreased to 9.77% (95% CrI: 4.53–14.81%) during the week of May 10, 2020 (Fig 3F).

204

## 205 **Discussion**

206 In light of the large uncertainties in IFRs for COVID-19 due to under-ascertainment of cases, we  
207 have used a model-inference system, developed to support the pandemic response in NYC, to  
208 estimate local IFRs. During March 1–May 16, 2020, NYC recorded the largest numbers of  
209 COVID-19 cases and deaths in the US and perhaps worldwide. Despite public health efforts to  
210 slow the pandemic, e.g. by social distancing, and to ramp up healthcare capacity, over 20,000  
211 lives were lost from COVID-19 in a short span of two months. Based on this large number of  
212 deaths, the estimated overall IFR was 1.45% in NYC. This estimate included both confirmed and  
213 probable COVID deaths. If only COVID confirmed deaths were included, given that 78.0% of  
214 deaths among the total were laboratory-confirmed, the estimated overall IFR would be around  
215 1.1%. Both estimates were higher than previously reported for elsewhere (e.g., about 0.7% in  
216 both China<sup>3</sup> and France<sup>5</sup>). Importantly, NYC has nosologists who review all death certificates  
217 and record deaths into a unified electronic reporting system rapidly. This mortality surveillance  
218 infrastructure and enhanced nosology thus allow more rapid and complete death reporting in  
219 NYC. As such, our estimates here likely more accurately reflect the underlying fatality risk of  
220 COVID-19 infection. Further, given the likely stronger public health infrastructure and  
221 healthcare systems in NYC than many other places,<sup>16</sup> the higher IFR estimated here suggests  
222 that mortality risk from COVID-19 may be higher in the United States and likely other countries  
223 as well than previously reported. Of note, despite the large surge in cases and hospitalizations,  
224 through quick expansion of healthcare systems, most hospitals in NYC were able to meet  
225 patient care demand during the two-month period. As many jurisdictions in the United States



226 are considering re-opening after months of social distancing, it is crucial that officials account  
227 for and closely monitor the infection rate and health outcomes including hospitalizations and  
228 mortality and take prompt public health responses accordingly.

229  
230 While the IFR estimated here was similar to those previously reported elsewhere for  
231 younger age groups, we found that IFRs for individuals 65 years and older in NYC were about  
232 twice as high as prior reports.<sup>3</sup> These higher IFRs may be in part due to differences in  
233 population characteristics, in particular, the prevalence of underlying medical conditions such  
234 as diabetes mellitus, chronic lung disease, and cardiovascular disease.<sup>17, 18</sup> Regardless,  
235 estimated weekly IFR was as high as 6.1% for 65-74 year-olds and 17.0% for 75+ year-olds.  
236 These dire estimates highlight the severity of COVID-19 in elderly populations and the  
237 importance of infection prevention in congregate settings. Thus, early detection and adherence  
238 to infection control guidance in long-term care and adult care facilities should be a priority for  
239 COVID-19 response as the pandemic continues to unfold.

240  
241 In this study, we incorporated multiple data sources, including age-grouped, spatially  
242 resolved case and mortality data as well as mobility data, to calibrate our model-inference  
243 system. Of note, the timing of the COVID-19 pandemic varied substantially among NYC  
244 neighborhoods. For instance, peak mortality rates occurred up to 4 weeks apart among the 42  
245 neighborhoods. Fitting the model-inference system simultaneously to these diverse case and  
246 mortality time series thus enabled better constraint of key model parameters (e.g., case  
247 reporting rate and IFR). However, we note there remain large uncertainties in model estimates.  
248 A full assessment of COVID-19 severity will require comprehensive serology surveys of the  
249 population by age group and neighborhood, given the large heterogeneity of infection rates  
250 across population segments and space. In addition, we only included deaths that were lab-  
251 confirmed or explicitly coded as related to COVID-19. A recent study reported that excess  
252 deaths in NYC during about the same period could be more than 24,000.<sup>8</sup> Further, recent  
253 studies have reported severe sequelae of COVID-19 in children, i.e. Multi-system Inflammatory

254 Syndrome in Children. Thus, it is important to monitor health outcomes in younger age groups  
255 post-infection as the pandemic unfolds, despite the low IFRs noted to date.

256

257 **Acknowledgments:**

258 This study was supported by the National Institute of Allergy and Infectious Diseases  
259 (AI145883), the National Science Foundation Rapid Response Research Program (RAPID;  
260 2027369), and the NYC DOHMH. We thank the NYC DOHMH Bureau of Vital Statistics team and  
261 staff members in the NYC DOHMH Incident Command System Surveillance and Epidemiology  
262 Section for data management. We thank Miranda S. Moore at NYC DOHMH, who wrote and  
263 maintained the code to generate weekly extracts of COVID-19 case data for provision to  
264 Columbia University under a data use agreement. We thank Jaimie Shaff at NYC DOHMH and  
265 Helen Alesbury and Kate Klein at the Office of Chief Medical Examiner of the City of New York  
266 for initiating and coordinating discussions on modeling COVID-19 mortality in NYC. We also  
267 thank Columbia University Mailman School of Public Health for high performance computing  
268 and Safe Graph ([safegraph.com](https://safegraph.com)) for providing the mobility data used in this study.

269

270 **Conflict of Interest:**

271 JS and Columbia University disclose partial ownership of SK Analytics. JS discloses consulting for  
272 BNI. Other authors declare no conflict of interest.

273

274 **References:**

- 275 1. World Health Organization. Coronavirus disease (COVID-2019) situation reports 2020  
276 [updated 6/26/2020; cited 2020 6/26]. Available from:  
277 <https://www.who.int/emergencies/diseases/novel-coronavirus-2019/situation-reports/>.  
278 2. Wu JT, Leung K, Bushman M, Kishore N, Niehus R, de Salazar PM, Cowling BJ, Lipsitch M,  
279 Leung GM. Estimating clinical severity of COVID-19 from the transmission dynamics in  
280 Wuhan, China. *Nat Med.* 2020;26(4):506-10. PubMed PMID: 32284616; PMCID:  
281 PMC7094929.

- 282 3. Verity R, Okell LC, Dorigatti I, Winskill P, Whittaker C, Imai N, Cuomo-Dannenburg G,  
283 Thompson H, Walker PGT, Fu H, Dighe A, Griffin JT, Baguelin M, Bhatia S, Boonyasiri A,  
284 Cori A, Cucunuba Z, FitzJohn R, Gaythorpe K, Green W, Hamlet A, Hinsley W, Laydon D,  
285 Nedjati-Gilani G, Riley S, van Elsland S, Volz E, Wang H, Wang Y, Xi X, Donnelly CA, Ghani  
286 AC, Ferguson NM. Estimates of the severity of coronavirus disease 2019: A model-based  
287 analysis. *The Lancet Infectious diseases*. 2020. PubMed PMID: 32240634; PMCID:  
288 PMC7158570.
- 289 4. Russell TW, Hellewell J, Jarvis CI, van Zandvoort K, Abbott S, Ratnayake R, group CC-w,  
290 Flasche S, Eggo RM, Edmunds WJ, Kucharski AJ. Estimating the infection and case fatality  
291 ratio for coronavirus disease (COVID-19) using age-adjusted data from the outbreak on  
292 the diamond princess cruise ship, february 2020. *Eurosurveillance*. 2020;25(12):2000256.
- 293 5. Salje H, Tran Kiem C, Lefrancq N, Courtejoie N, Bosetti P, Paireau J, Andronico A, Hoze N,  
294 Richet J, Dubost CL, Le Strat Y, Lessler J, Levy-Bruhl D, Fontanet A, Opatowski L, Boelle PY,  
295 Cauchemez S. Estimating the burden of SARS-cov-2 in France. *Science*. 2020. PubMed  
296 PMID: 32404476.
- 297 6. NewYork City Department of Health and Mental Hygiene. NYC uhf 42 neighborhoods.  
298 Available from: <http://a816-dohbesp.nyc.gov/IndicatorPublic/EPHTPDF/uhf42.pdf>.
- 299 7. Anderson JL. An ensemble adjustment Kalman filter for data assimilation. *Mon Weather*  
300 *Rev*. 2001;129(12):2884-903.
- 301 8. New York City Department of Health and Mental Hygiene (DOHMH) COVID-19 Response  
302 Team. Preliminary estimate of excess mortality during the COVID-19 outbreak — New  
303 York City, march 11–may 2, 2020. *MMWR Morbidity and mortality weekly report*.  
304 2020;69:603-5.
- 305 9. SafeGraph. Weekly patterns: Foot traffic data to understand the COVID-19 pandemic  
306 2020. Available from: <https://www.safegraph.com/weekly-foot-traffic-patterns>.
- 307 10. Lasry A, Kidder D, Hast M, Poovey J, Sunshine G, Winglee K, Zviedrite N, Ahmed F, Ethier  
308 KA, Program CDCPHL, New York City Department of H, Mental H, Louisiana Department of  
309 H, Public Health S, King C, San Francisco C-RT, Alameda County Public Health D, San Mateo  
310 County Health D, Marin County Division of Public H. Timing of community mitigation and

- 311 changes in reported COVID-19 and community mobility - four U.S. Metropolitan areas,  
312 february 26-april 1, 2020. MMWR Morbidity and mortality weekly report.  
313 2020;69(15):451-7. PubMed PMID: 32298245.
- 314 11. Yang W, Kandula S, Shaman J. Eight-week model projections of COVID-19 in New York City  
315 2020 [updated March 16, 2020]. Available from: [https://github.com/wan-](https://github.com/wan-yang/COLUMBIA-COVID19-PROJECTIONS-FOR-NYC/blob/master/summary_nyc.projection200316_CU_updated.pdf)  
316 [yang/COLUMBIA-COVID19-PROJECTIONS-FOR-](https://github.com/wan-yang/COLUMBIA-COVID19-PROJECTIONS-FOR-NYC/blob/master/summary_nyc.projection200316_CU_updated.pdf)  
317 [NYC/blob/master/summary\\_nyc.projection200316\\_CU\\_updated.pdf](https://github.com/wan-yang/COLUMBIA-COVID19-PROJECTIONS-FOR-NYC/blob/master/summary_nyc.projection200316_CU_updated.pdf).
- 318 12. New York State Department of Health. New York state on pause 2020 [cited 2020  
319 5/16/2020]. Available from: <https://coronavirus.health.ny.gov/new-york-state-pause>.
- 320 13. [www.governor.ny.gov](http://www.governor.ny.gov). Amid ongoing COVID-19 pandemic, governor cuomo announces  
321 results of completed antibody testing study of 15,000 people showing 12.3 percent of  
322 population has COVID-19 antibodies 2020 [updated MAY 2, 2020; cited 2020 5/12/2020].  
323 Available from: [https://www.governor.ny.gov/news/amid-ongoing-covid-19-pandemic-](https://www.governor.ny.gov/news/amid-ongoing-covid-19-pandemic-governor-cuomo-announces-results-completed-antibody-testing)  
324 [governor-cuomo-announces-results-completed-antibody-testing](https://www.governor.ny.gov/news/amid-ongoing-covid-19-pandemic-governor-cuomo-announces-results-completed-antibody-testing).
- 325 14. Goodman JD, Rothfeld M. 1 in 5 new yorkers may have had covid-19, antibody tests  
326 suggest 2020 [updated 4/23/2020; cited 2020 5/12/2020]. Available from:  
327 <https://www.nytimes.com/2020/04/23/nyregion/coronavirus-antibodies-test-ny.html>.
- 328 15. Yang W, Kandula S, Shaman J. Projections of covid19 epidemic outcomes and healthcare  
329 demands for New York City (NYC) 2020 [cited 2020 5/12/2020]. Available from:  
330 <https://github.com/wan-yang/COLUMBIA-COVID19-PROJECTIONS-FOR-NYC>.
- 331 16. Medbelle. Best hospital cities ranking 2019 2019. Available from:  
332 <https://www.medbelle.com/best-hospital-cities-usa>.
- 333 17. Clark A, Jit M, Warren-Gash C, Guthrie B, Wang HH, Mercer SW, Sanderson C, McKee M,  
334 Troeger C, Ong KI, Checchi F, Perel P, Joseph S, Gibbs HP, Banerjee A, Eggo RM. How many  
335 are at increased risk of severe COVID-19 disease? Rapid global, regional and national  
336 estimates for 2020. medRxiv. 2020:2020.04.18.20064774.
- 337 18. CDC COVID-19 Response Team. Preliminary estimates of the prevalence of selected  
338 underlying health conditions among patients with coronavirus disease 2019—United

339 States, february 12–march 28, 2020. Morbidity and Mortality Weekly Report.  
340 2020;69(13):382.  
341

Table 1. Summary estimates. Cases and deaths were reported during March 1 – May 16, 2020. Crude case fatality risk (CFR) was computed as the proportion of persons with confirmed COVID-19 illness who died. Cumulative infection rates, median (95% CrI), show percentages of population, for each age group or all ages overall, estimated to have been infected by May 16, 2020. IFR, median (95% CrI), was estimated here, and averaged over March 22 - May 16, 2020; we excluded estimates during March 1-21, 2020, because estimates were less accurate for these earliest weeks when zero or few deaths were reported.

| Age   | Confirmed Cases | Confirmed and Probable Deaths | Estimated cumulative infection rate (%) | Estimated IFR (%)    |
|-------|-----------------|-------------------------------|-----------------------------------------|----------------------|
| <25   | 14692           | 40                            | 8 (5.1, 16.7)                           | 0.011 (0.005, 0.016) |
| 25-44 | 60474           | 688                           | 20.1 (14.4, 30)                         | 0.12 (0.077, 0.15)   |
| 45-64 | 69839           | 4457                          | 20.7 (15.7, 28)                         | 0.94 (0.74, 1.21)    |
| 65-74 | 23875           | 4866                          | 14.9 (11.2, 22.8)                       | 4.67 (3.22, 6.66)    |
| 75+   | 22512           | 10090                         | 12.9 (9.9, 19.9)                        | 13.83 (9.65, 17.78)  |
| all   | 191392          | 20141                         | 15.8 (11.4, 24.4)                       | 1.45 (1.09, 1.87)    |

## Figures

**Figure 1.** Model fit. Black boxes show model estimates of cases per 100,000 population and grey boxes show model estimates of mortality rates; thick horizontal lines and box edges show the median, 25<sup>th</sup>, and 75<sup>th</sup> percentiles; vertical lines extending from each box show 95% CrI. Blue dots indicate observed incidence rates and red dots show observed mortality rates.

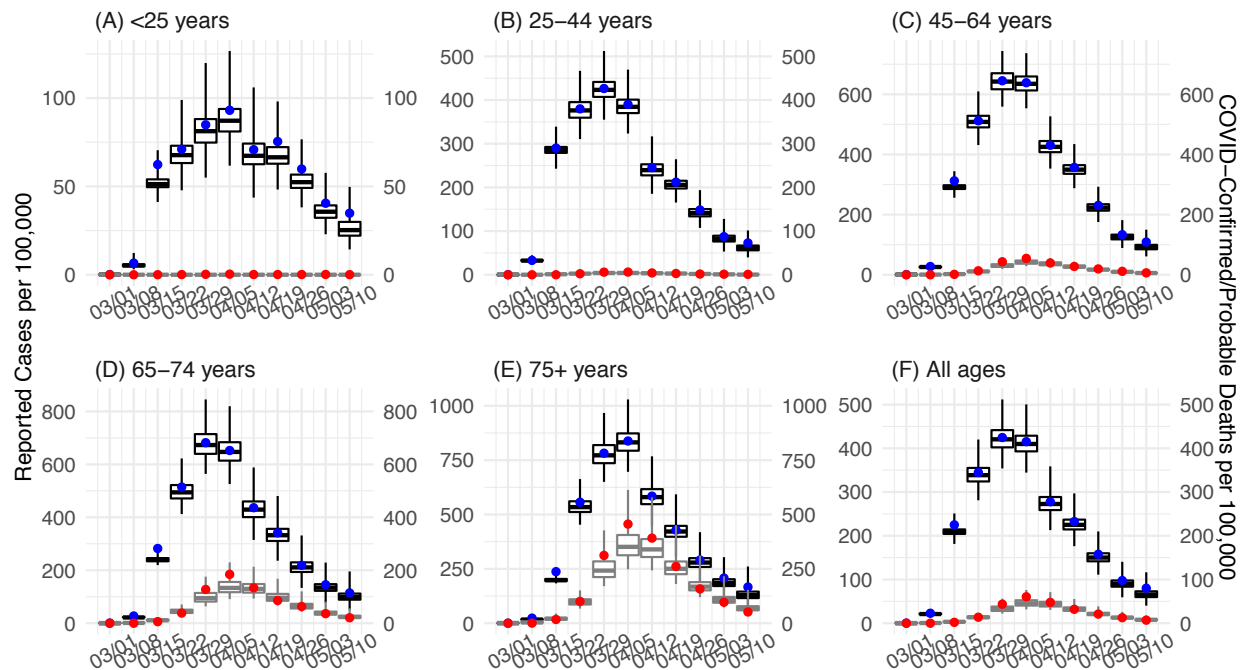



**Figure 2.** Estimated infection and case reporting rates over time. Boxplots show estimated infection rates. Red lines show the estimated median case reporting rate with surrounding areas show the 50% and 95% CrI. x-axis shows the first day of each week (mm/dd) from the week of March 1 to the week of March 10, 2020.

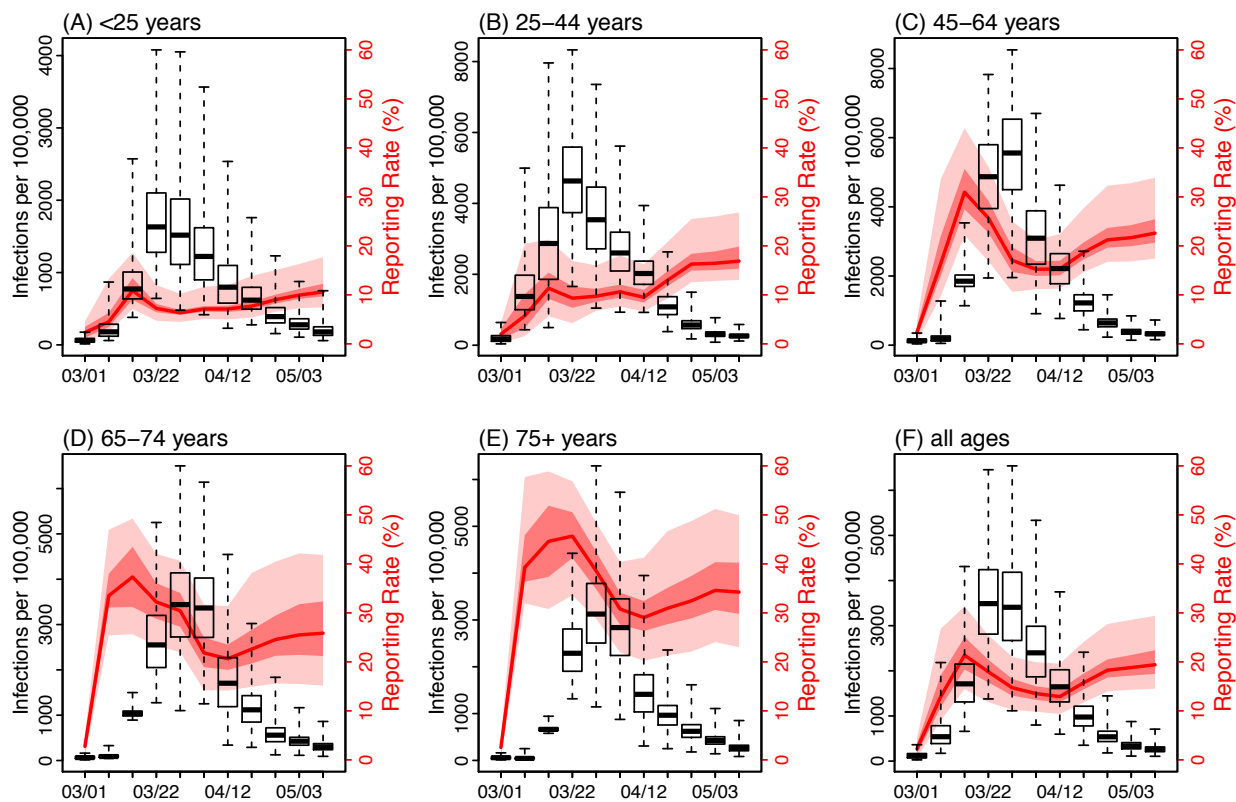

**Figure 3.** Estimated infection fatality risk. Red lines show the estimated median IFR with surrounding areas indicating the 50% and 95% CrI. For comparison, the grey bars show the number of deaths reported for each week from the week of March 1 to May 10, 2020.

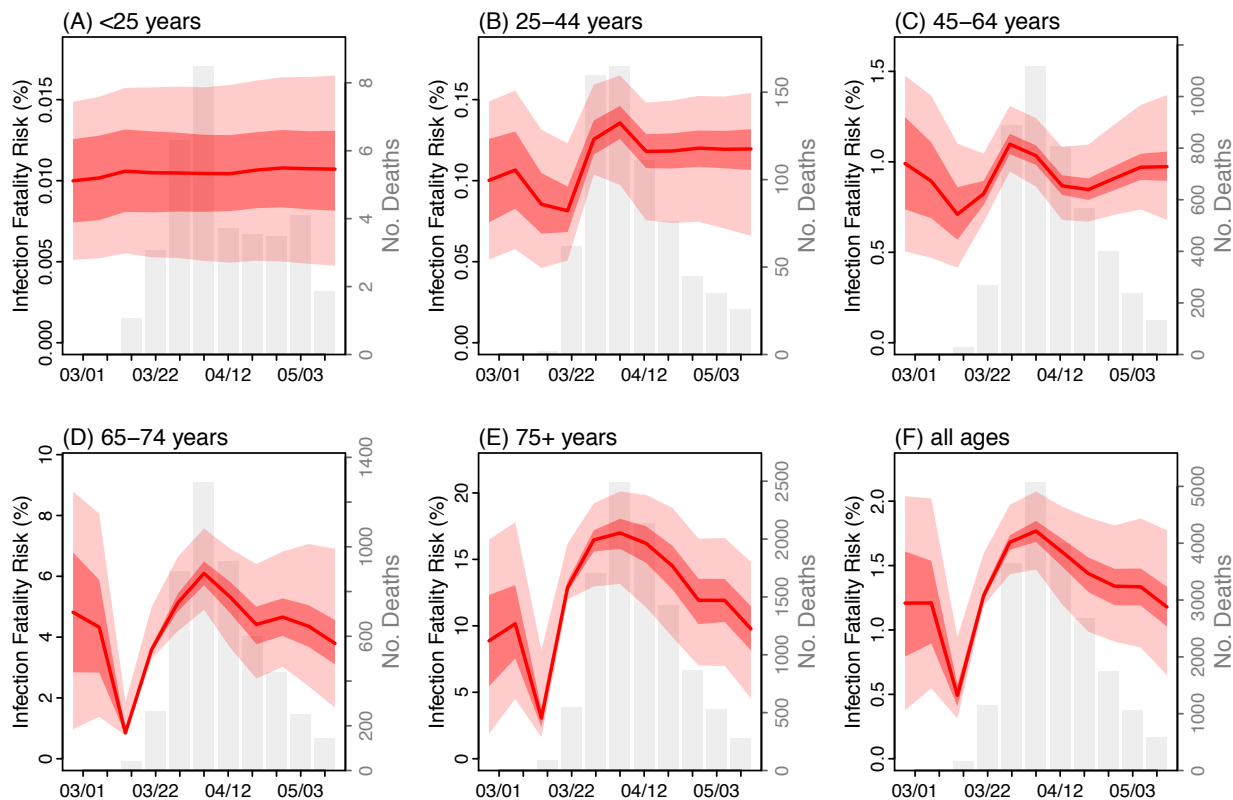

Supplementary Material

**Table S1.** Prior ranges for main model parameters and variables. The spatial, temporal, and age resolution of each parameter or variable, estimated in the model-inference system, is specified in the column "Resolution". Note posterior parameter estimates can extend outside the specified prior ranges.

| Parameter/variable  | Symbol   | Resolution                                                                                        | Prior range                                                                              | Source/rationale                                                           |
|---------------------|----------|---------------------------------------------------------------------------------------------------|------------------------------------------------------------------------------------------|----------------------------------------------------------------------------|
| Initial exposed     | $E(t=0)$ | neighborhood- and age- group specific, estimated for the beginning of the Week of March 1, 2020   | 300 – 8000 total citywide, scaled by population size for each age group and neighborhood | Large uncertainties, used very wide range                                  |
| Initial infectious  | $I(t=0)$ | neighborhood- and age- group specific, , estimated for the beginning of the Week of March 1, 2020 | 150 – 4000 total citywide, scaled by population size for each age group and neighborhood | Assumed to be half the initial exposed                                     |
| Initial susceptible | $S(t=0)$ | neighborhood- and age- group specific, estimated for the beginning of the Week of March 1, 2020   | $N - E - I$                                                                              | Assumed all were susceptible except for those initially exposed/infectious |

---

|                                                    |                |                                                               |                                                                                                                               |                                                                                                                                           |
|----------------------------------------------------|----------------|---------------------------------------------------------------|-------------------------------------------------------------------------------------------------------------------------------|-------------------------------------------------------------------------------------------------------------------------------------------|
| Population size in each age group and neighborhood | $N$            | neighborhood- and age-group specific                          | N/A                                                                                                                           | NYC intercensal population estimates for 2018 <sup>1</sup>                                                                                |
| Citywide transmission rate                         | $\beta_{city}$ | Citywide, age-group specific, estimated for each week         | [0.5, 1] per day overall; scaled by contact rate for each age group based on contact data from the POLYMOD study <sup>2</sup> | Based on $R_0$ estimates of around 1.5-4 for SARS-CoV-2 <sup>3-5</sup>                                                                    |
| Scaling of neighborhood transmission rate          | $b_i$          | neighborhood- and age-group specific, estimated for each week | [0.8, 1.2] for age groups under 65 years; [0.5, 1.5] for age groups 65 or older                                               | Around 1; larger variation for elderly groups based on data                                                                               |
| Latency period                                     | $Z$            | Citywide, age-group specific, estimated for each week         | [2, 5] days                                                                                                                   | Incubation period: 5.2 days (95% CI: 4.1, 7) <sup>3</sup> ; latency period is likely shorter than the incubation period                   |
| Infectious period                                  | $D$            | Citywide, age-group specific, estimated for each week         | [2, 5] days                                                                                                                   | Time from symptom onset to hospitalization: 3.8 days (95% CI: 0, 12.0) in China, <sup>6</sup> plus 1-2 days viral shedding before symptom |

---

---

|                                    |       |                                                       |                                                                                                                                     |                                                                                                                                                                                                                                                                                                                                                                                                                                                                                   |
|------------------------------------|-------|-------------------------------------------------------|-------------------------------------------------------------------------------------------------------------------------------------|-----------------------------------------------------------------------------------------------------------------------------------------------------------------------------------------------------------------------------------------------------------------------------------------------------------------------------------------------------------------------------------------------------------------------------------------------------------------------------------|
|                                    |       |                                                       |                                                                                                                                     | onset. We did not distinguish symptomatic/asymptomatic infections.                                                                                                                                                                                                                                                                                                                                                                                                                |
| Multiplicative factor for mobility | $m_1$ | Citywide, age-group specific, estimated for each week | [1, 2] for <1 year; [0.5, 1.5] for three age groups 1-24 years; [0.1, 1.5] for age group 25-44; [1, 2.5] for age groups 45 or older | Initial model testing showed transmission rates for younger age groups were more sensitive to changes in mobility whereas the two oldest age groups were not sensitive to mobility. For age groups with contact rates lower than the average (based on the POLYMOD study <sup>2</sup> ), we raised the diagonal elements in the mobility matrix to the power of the relative contact rate (<1) to account for insensitivity of transmission rate in these age groups to mobility. |

---

|                                                                  |          |                                                       |                                                                                                                                      |                                                                                                                                                           |
|------------------------------------------------------------------|----------|-------------------------------------------------------|--------------------------------------------------------------------------------------------------------------------------------------|-----------------------------------------------------------------------------------------------------------------------------------------------------------|
| Multiplicative factor for neighborhood connectivity              | $m_2$    | Citywide, age-group specific, estimated for each week | [0.5, 2]                                                                                                                             | Likely around 1 but with large uncertainties                                                                                                              |
| Mean of time from viral shedding to diagnosis                    | $T_m$    | Citywide, age-group specific, estimated for each week | [3, 8] days                                                                                                                          | From a few days to a week from symptom onset to diagnosis/reporting, <sup>6</sup> plus 1-2 days of viral shedding (being infectious) before symptom onset |
| Standard deviation (SD) of time from viral shedding to diagnosis | $T_{sd}$ | Citywide, age-group specific, estimated for each week | [1, 3] days                                                                                                                          | To allow variation in time to diagnosis/reporting                                                                                                         |
| Reporting rate                                                   | $r$      | Citywide, age-group specific, estimated for each week | Starting from [0.001, 0.05] at time 0 and allowed to increase over time using space re-probing <sup>7</sup>                          | Large uncertainties                                                                                                                                       |
| Infection fatality risk (IFR)                                    |          | Citywide, age-group specific, estimated for each week | [5, 15]×10 <sup>-4</sup> for ages under 25; [5, 15]×10 <sup>-3</sup> for ages 25-44; [5, 15]×10 <sup>-2</sup> for ages 45-64; [0.01, | Based on previous estimates <sup>8</sup> but extend to have wider ranges                                                                                  |

---

|                    |          |                                  |                                   |
|--------------------|----------|----------------------------------|-----------------------------------|
|                    |          | 0.1] for ages 65-74; [0.02, 0.2] |                                   |
|                    |          | for ages 75+;                    |                                   |
| Time from          | Citywide | Gamma distribution with mean     | Based on $n=15,686$ COVID-19      |
| diagnosis to death |          | of 9.36 days and SD of 9.76      | confirmed deaths in NYC as of May |
|                    |          | days                             | 17, 2020.                         |

---

References:

1. New York City Department of Health and Mental Hygiene. NYC DOHMH population estimates, modified from US census bureau interpolated intercensal population estimates, 2000-2018. . Updated August 2019. ed.
2. Mossong J, Hens N, Jit M, Beutels P, Auranen K, Mikolajczyk R, Massari M, Salmaso S, Tomba GS, Wallinga J, Heijne J, Sadkowska-Todys M, Rosinska M, Edmunds WJ. Social contacts and mixing patterns relevant to the spread of infectious diseases. *PLoS Med.* 2008;5(3):e74. Epub 2008/03/28. PubMed PMID: 18366252; PMCID: 2270306.
3. Li Q, Guan X, Wu P, Wang X, Zhou L, Tong Y, Ren R, Leung KSM, Lau EHY, Wong JY, Xing X, Xiang N, Wu Y, Li C, Chen Q, Li D, Liu T, Zhao J, Liu M, Tu W, Chen C, Jin L, Yang R, Wang Q, Zhou S, Wang R, Liu H, Luo Y, Liu Y, Shao G, Li H, Tao Z, Yang Y, Deng Z, Liu B, Ma Z, Zhang Y, Shi G, Lam TTY, Wu JT, Gao GF, Cowling BJ, Yang B, Leung GM, Feng Z. Early transmission dynamics in Wuhan, China, of novel coronavirus–infected pneumonia. *New Engl J Med.* 2020.
4. Wu JT, Leung K, Leung GM. Nowcasting and forecasting the potential domestic and international spread of the 2019-ncov outbreak originating in Wuhan, China: A modelling study. *Lancet.* 2020. PubMed PMID: 32014114.
5. Li R, Pei S, Chen B, Song Y, Zhang T, Yang W, Shaman J. Substantial undocumented infection facilitates the rapid dissemination of novel coronavirus (SARS-cov-2). *Science.* 2020;368(6490):489-93.



6. Zhang J, Litvinova M, Wang W, Wang Y, Deng X, Chen X, Li M, Zheng W, Yi L, Chen X, Wu Q, Liang Y, Wang X, Yang J, Sun K, Longini IM, Jr., Halloran ME, Wu P, Cowling BJ, Merler S, Viboud C, Vespignani A, Ajelli M, Yu H. Evolving epidemiology and transmission dynamics of coronavirus disease 2019 outside hubei province, China: A descriptive and modelling study. *The Lancet Infectious diseases*. 2020. PubMed PMID: 32247326.
7. Yang W, Shaman J. A simple modification for improving inference of non-linear dynamical systems. *arXiv*. 2014:1403.6804. Epub 26 Mar 2014.
8. Verity R, Okell LC, Dorigatti I, Winskill P, Whittaker C, Imai N, Cuomo-Dannenburg G, Thompson H, Walker PGT, Fu H, Dighe A, Griffin JT, Baguelin M, Bhatia S, Boonyasiri A, Cori A, Cucunuba Z, FitzJohn R, Gaythorpe K, Green W, Hamlet A, Hinsley W, Laydon D, Nedjati-Gilani G, Riley S, van Elsland S, Volz E, Wang H, Wang Y, Xi X, Donnelly CA, Ghani AC, Ferguson NM. Estimates of the severity of coronavirus disease 2019: A model-based analysis. *The Lancet Infectious diseases*. 2020. PubMed PMID: 32240634; PMCID: PMC7158570.
